# Supplementary material
Source: MDPI journal article supplement (https://www.mdpi.com/1999-4907/14/3/653)
Supplement: s1 [file s1]

Table S1: Information of the *Ganoderma* species and genome assemblies.

| <b>Species<br/>(Assembly accession<br/>No.)</b>             | <b>Submitter</b>                                                               | <b>Geographic<br/>location of<br/>biological sample</b> | <b>Host</b> | <b>Other<br/>information</b>    |
|-------------------------------------------------------------|--------------------------------------------------------------------------------|---------------------------------------------------------|-------------|---------------------------------|
| <i>G. boninense</i> G3<br>(GCA_002900995.2)                 | PT SMART Tbk,<br>Indonesia                                                     | Indonesia                                               | oil palm    | mycelium culture                |
| <i>G. boninense</i> NJ3<br>(GCA_001855635.1)                | CIRAD, France                                                                  | Tanah Gambus,<br>Sumatra, Indonesia                     | oil palm    | Carpospore;<br>mycelium culture |
| <i>G. lucidum</i> G260125-1<br>(GCA_000262775.1)            | The Institute of Medicinal<br>Plant Development,<br>China.                     | LuoTian, Hubei<br>Province, China                       | -           |                                 |
| <i>G. lucidum</i> Xiangnong<br>(GCA_000271565.1)            | Huazhong University of<br>Science and Technology,<br>China                     | China                                                   | -           | -                               |
| <i>G. lucidum</i> BCRC36111<br>(GCA_012655175.1)            | China Medical University,<br>China                                             | China                                                   |             | Mycelium culture                |
| <i>G. lucidum</i> BCRC37177<br>(GCA_000338035.1)            | <i>Ganoderma lucidum</i><br>Research Consortium,<br>Taiwan                     | Taiwan                                                  | -           | -                               |
| <i>G. multipileum</i> BCRC<br>37180<br>(GCA_000338015.1)    | <i>Ganoderma lucidum</i><br>Research Consortium,<br>Taiwan                     | Taiwan                                                  | -           | -                               |
| <i>G. sinense</i> ZZ0214-1<br>(GCA_002760635.1)             | The Institute of Medicinal<br>Plant Development,<br>China.                     | LuoTian, Hubei<br>Province, China                       | -           | Haploid; mycelial<br>culture    |
| <i>G. tsugae</i> s90<br>(GCA_003057275.1)                   | Biotechnology and<br>Nuclear Technology<br>Research Institute, China           | Wangqing, China                                         | -           | Forest; dead wood               |
| <i>Ganoderma</i> sp.<br><i>BRIUMSc</i><br>(GCA_008694245.1) | Biotechnology Research<br>Institute, Universiti<br>Malaysia Sabah,<br>Malaysia | Kudat, Sabah                                            | oil palm    | Oil palm trunk                  |
